# Supplementary material
Source: publisher figshare collection journal article supplement (https://tandf.figshare.com/ndownloader/files/22590797)
Supplement: Supplementary file 1 [file 22590797]

**Colorimetric paper bioassay by horseradish peroxidase for the detection of catechol and resorcinol in aqueous samples**

Ajinkya Dabhade 1, Sivaraman Jayaraman 2, Balasubramanian Paramasivan 1, *

1 Agricultural and Environmental Biotechnology Lab, Department of Biotechnology and Medical Engineering, National Institute of Technology Rourkela, India – 769008

2 Medical Electronics and Instrumentation Lab, Department of Biotechnology and Medical Engineering, National Institute of Technology Rourkela, India – 769008

*Corresponding author e-mail: [biobala@nitrkl.ac.in](mailto:biobala@nitrkl.ac.in); (+91) 661 2462297

**21.04.2020**

**Supplementary Data**


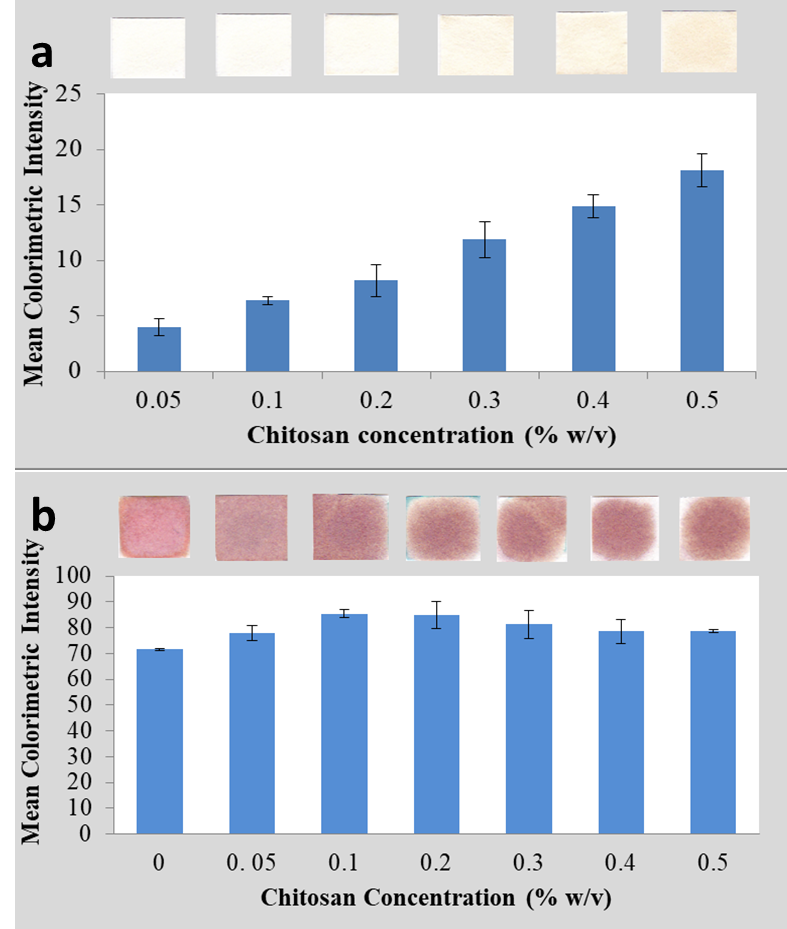


**S. Fig. 1**:a) Background intensity of chitosan modified Whatman #1 paper with immobilized HRP before catechol dispensation and b) Determination of optimum chitosan concentration


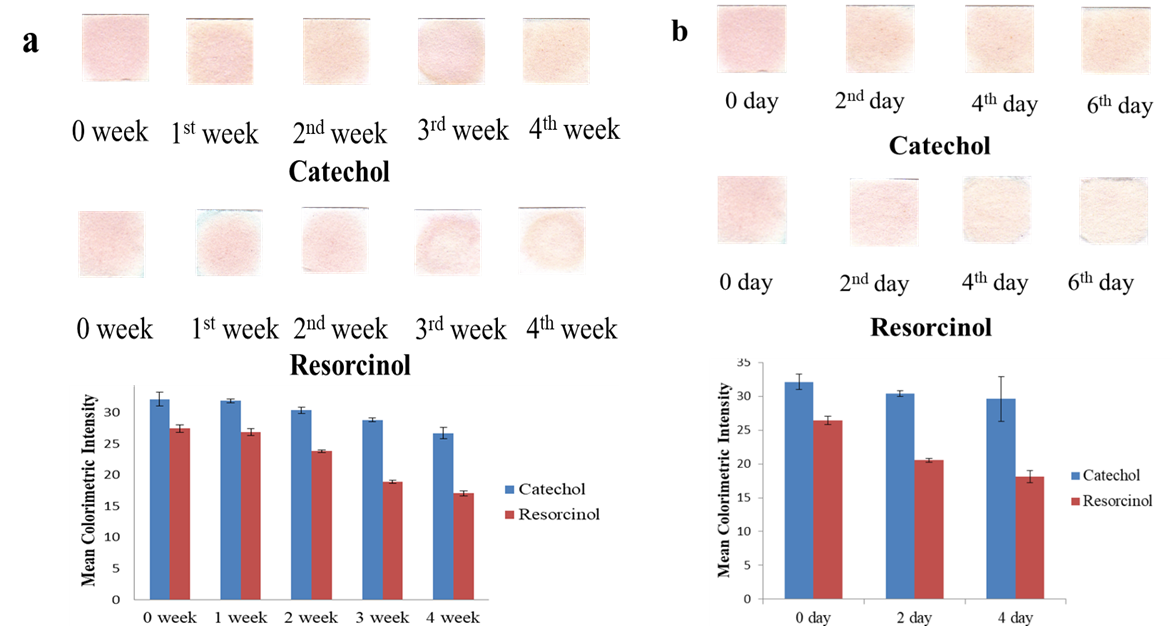


**S. Fig. 2:** Shelf life of biosensor a) at 4○C and b) at room temperature


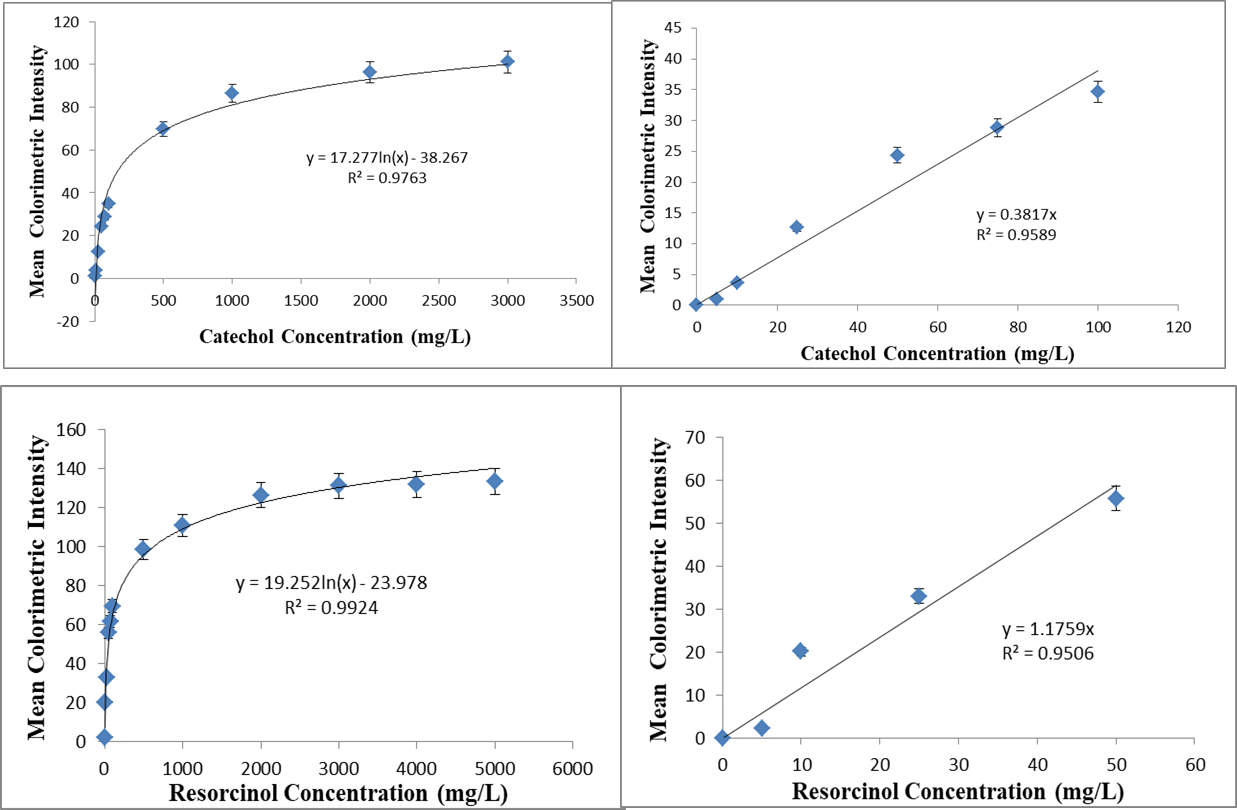


**S. Fig. 3**: Calibration curve for catechol and resorcinol detection using HRP as immobilized enzyme on paper
